# Supplementary material for: Toward real-world automated antibody design with combinatorial Bayesian optimization
Source: PubMed Central journal article supplement — Cell Rep Methods. 2023 Jan 3;3(1):100374. doi: 10.1016/j.crmeth.2022.100374 (PMC9939385; doi:10.1016/j.crmeth.2022.100374), 2023-01-03
Supplement: mmc1.pdf [file mmc1.pdf]

**Cell Reports Methods, Volume 3**

**Supplemental information**

**Toward real-world automated antibody design  
with combinatorial Bayesian optimization**

**Asif Khan, Alexander I. Cowen-Rivers, Antoine Grosnit, Derrick-Goh-Xin Deik, Philippe A. Robert, Victor Greiff, Eva Smorodina, Puneet Rawat, Rahmad Akbar, Kamil Dreczkowski, Rasul Tutunov, Dany Bou-Ammar, Jun Wang, Amos Storkey, and Haitham Bou-Ammar**

## Supplementary Information

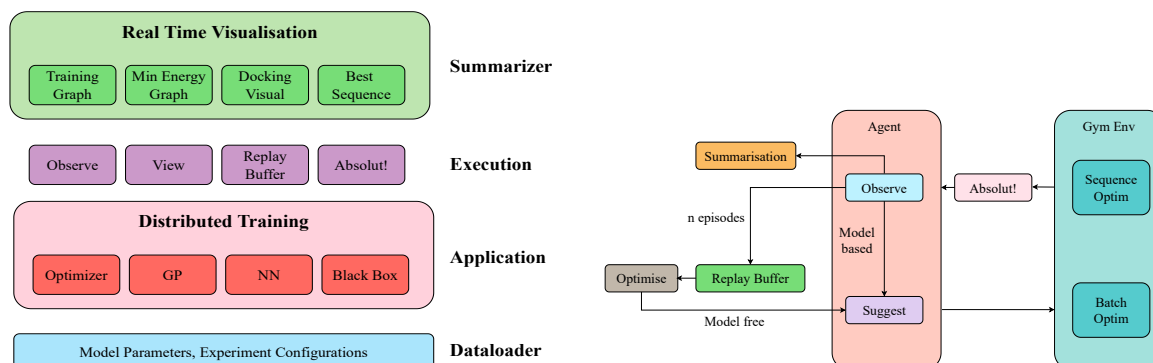

(a) Architecture of end-to-end framework for black-box optimisation. The architecture divides into four layers. The bottom layer consists of model parameters and experiment configurations which could be defined by the developers. The application layer, pre-written or written by developers, sets up the components for the execution layer. The detail of the execution layer is shown on the right side. The summarise layer collects data every iteration and produces real-time visualisation of the results.

(b) Abstraction within the execution layer. The agent suggests the CDRH3 sequences and passes them into the gym environment. The gym environment evaluates the corresponding binding energies with Absolut!. The agent observes the results and calls the summarisation function to update real-time data. The results are stored in the replay buffer, which can be used to train deep reinforcement learning models. Within the observe function, the model-based agent also optimises the model. The agent then suggests the new CDRH3 sequences in the next iteration.

Figure S 1: Layout of AntBO software as introduced in Method Section 11.7 of a manuscript. On the left is the architecture of the framework. On the right is the illustration of the execution layer.

| Step | Sequence      | Energy  |                                                                                      |
|------|---------------|---------|--------------------------------------------------------------------------------------|
| 0    | HICAGFWHMPI   | -88.31  | 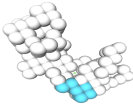   |
| 10   | TDKTHPEVYTR   | -67.36  |    |
| 20   | HYGMFLLPVGL   | -97.67  |    |
| 30   | HGHMFLLHVIL   | -90.44  |  |
| 40   | HFGMFELYVIL   | -100.75 |                                                                                      |
| 50   | HFVMFFLYVAL   | -102.87 |                                                                                      |
| 60   | HFVMPLLVLML   | -98.53  |                                                                                      |
| 70   | HFVMFYLVLMML* | -102.68 |                                                                                      |
| 80   | HFTMFFLVLMML  | -105.87 |                                                                                      |
| 90   | HFTMCFLVLML   | -102.31 |                                                                                      |
| 100  | FFIMFFLQLIL   | -106.61 |  |
| 110  | FFIMFFLVLCL   | -109.5  |                                                                                      |
| 120  | FFIMFPLVLI    | -107.18 |                                                                                      |
| 130  | PFIMFFLVLT    | -104.53 |                                                                                      |
| 140  | FFIMFLLVFL    | -108.22 |                                                                                      |
| 150  | FFIMFLLHLYL   | -96.04  |                                                                                      |
| 160  | CFIMFLLVLT    | -107.29 |                                                                                      |
| 170  | FFIFFLSVLWL   | -102.17 |                                                                                      |
| 180  | FFIFFLLFTIL   | -107.2  |                                                                                      |
| 190  | FFIFFVLFIL*   | -110.42 |  |

\* +

Figure S 2: An example of a trajectory of sequences every ten steps generated by *AntBO*, annotated with their respective binding affinity, Related to Figure 2 and Section 3.4.1 of a manuscript. The structures of sequences are shown on the right. Each structure is denoted by a different colour, and from steps 40 to 197, the sequences share the same binding structure (in purple). Additionally, two sequences (70 and 190, marked with an asterisk) add an equally optimal binding structure (i.e., two binding modes), shown in green.

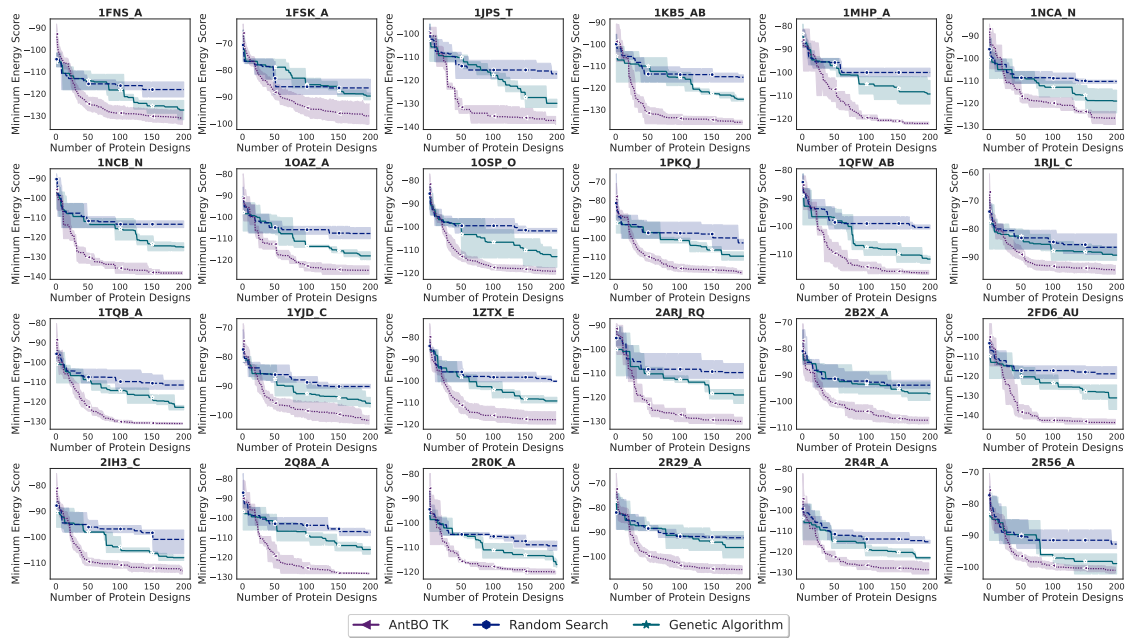

(a)

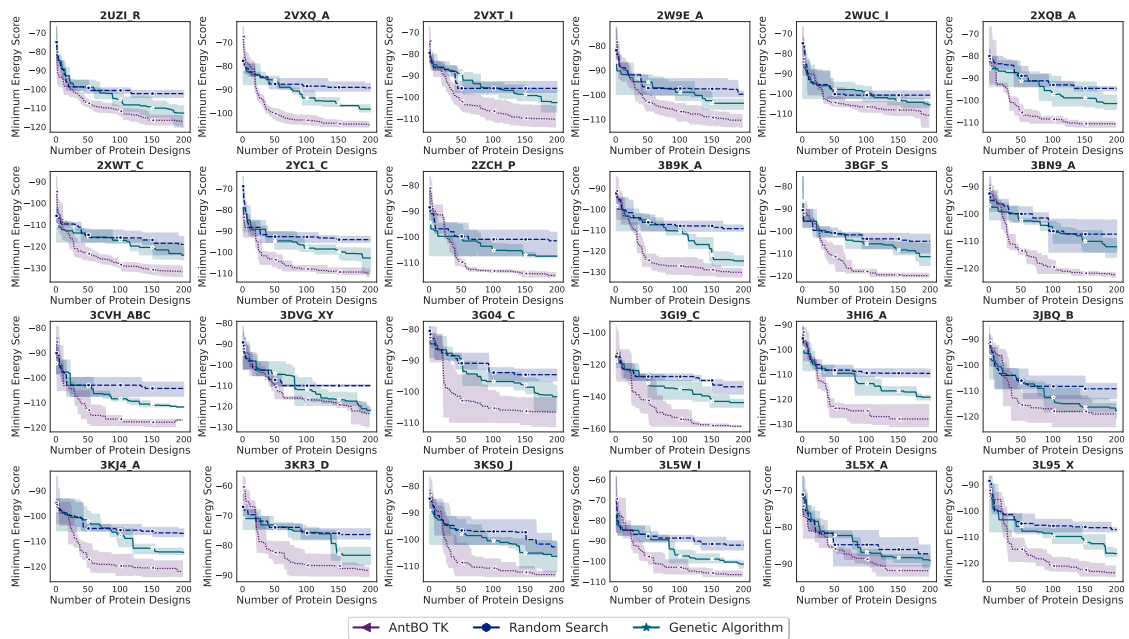

(b)

Figure S 3: Evaluation of AntBO on remaining antigens. Here, we report binding energy vs the number of protein designs comparing best performing AntBO TK with random search and genetic algorithm baseline. Related to Figure 2 of the manuscript.

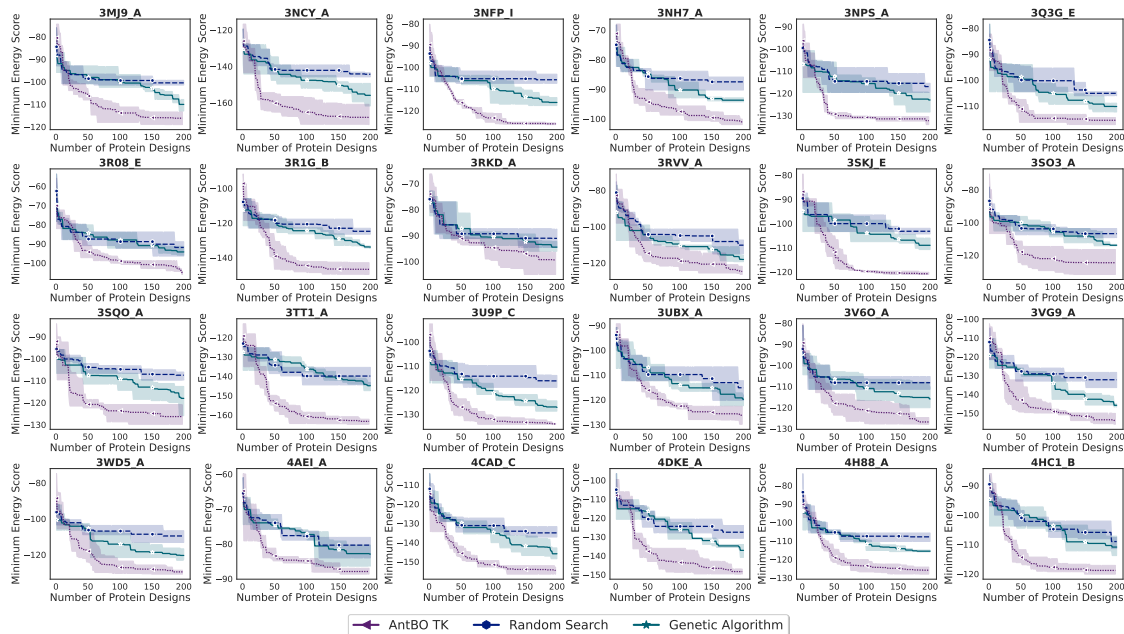

(a)

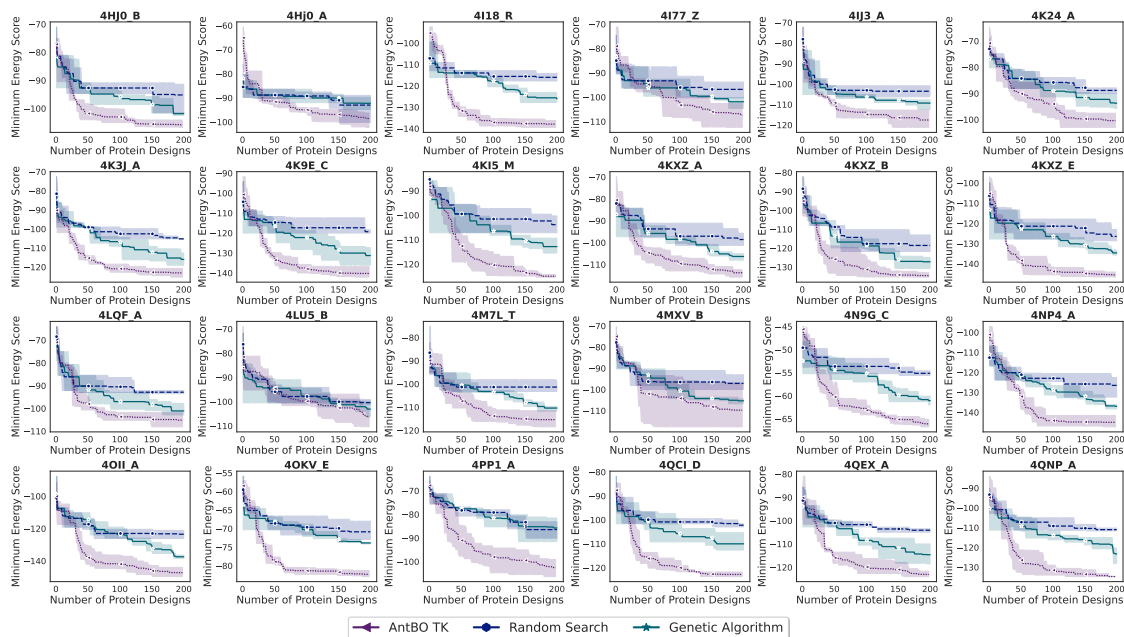

(b)

Figure S 4: Evaluation of AntBO on remaining antigens. Here, we report binding energy vs the number of protein designs comparing best performing AntBO TK with random search and genetic algorithm baseline. Related to Figure 2 of the manuscript.

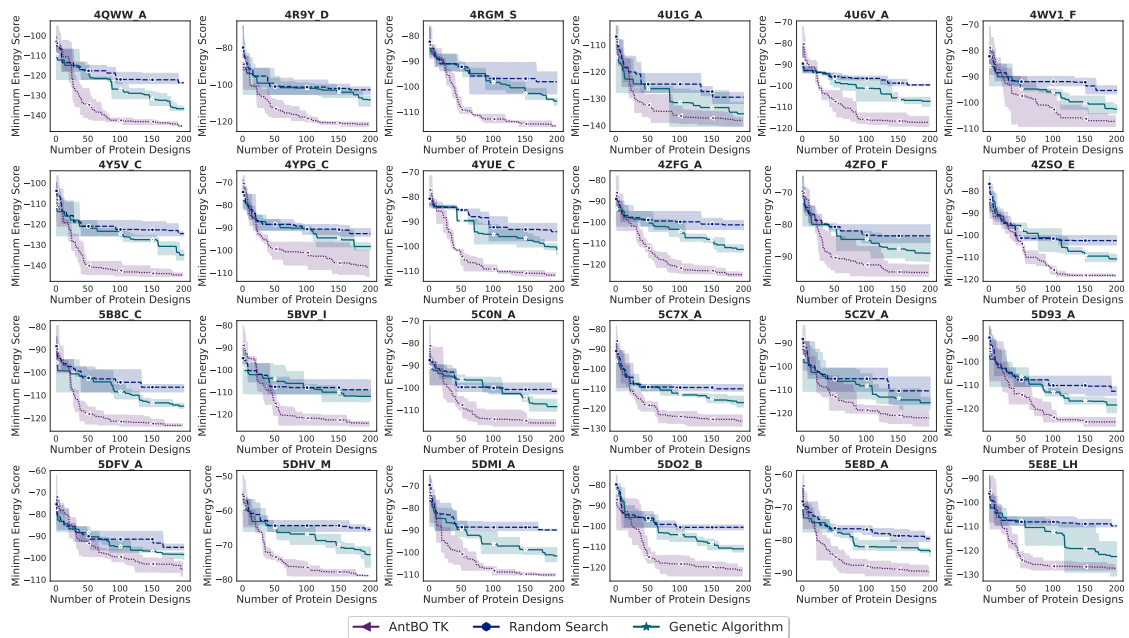

(a)

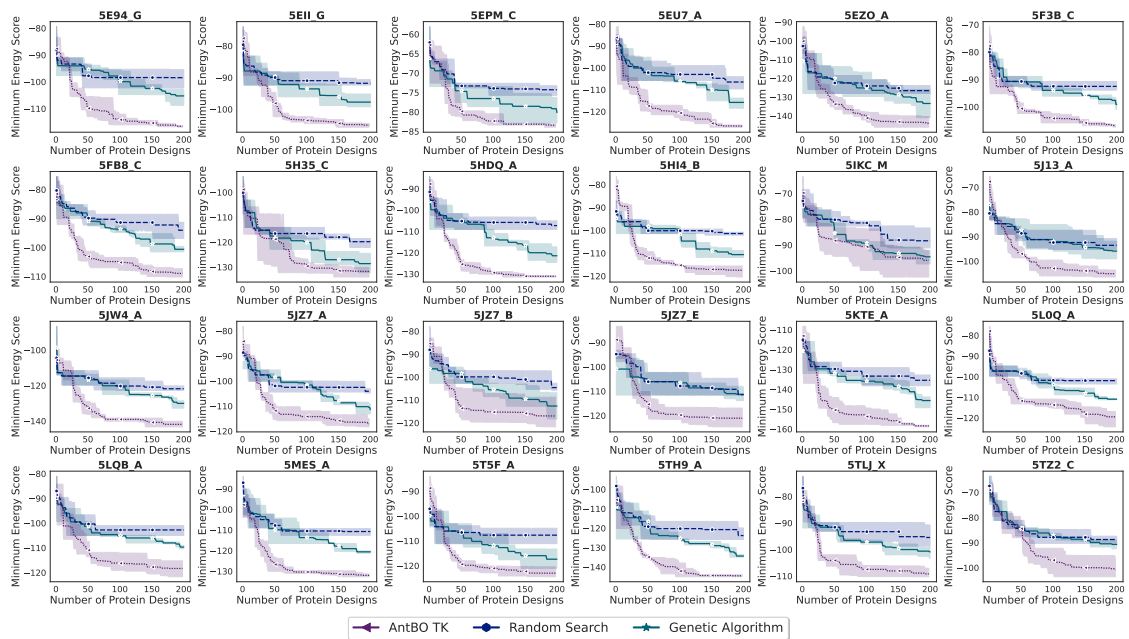

(b)

Figure S 5: Evaluation of AntBO on remaining antigens. Here, we report binding energy vs the number of protein designs comparing best performing AntBO TK with random search and genetic algorithm baseline. Related to Figure 2 of the manuscript.

| Algorithm                                             | Hyperparameter                                   | Value                                          |
|-------------------------------------------------------|--------------------------------------------------|------------------------------------------------|
| AntBO TK /<br>AntBO NT /<br>AntBO SSK /<br>AntBO BERT | Acquisition function                             | Expected Improvement                           |
|                                                       | Nb. of initial points                            | 20                                             |
|                                                       | Normalise                                        | True                                           |
|                                                       | Kernel Type TK /                                 | Transformed Overlap Kernel /                   |
|                                                       | Kernel Type NT /                                 | Transformed Overlap Kernel /                   |
|                                                       | Kernel Type SSK /                                | Fast String Kernel /                           |
|                                                       | Kernel Type BERT                                 | RBF Kernel with lengthscale on BERT features   |
|                                                       | Noise Variance                                   | 1e-6                                           |
|                                                       | Search Strategy                                  | CDRH3 (trust-region) Local Search              |
|                                                       | Use trust region TK / NT / SSK / BERT            | Yes / No / Yes / Yes                           |
| COMBO                                                 | Trust region Length Min $d_{\min}$               | 1                                              |
|                                                       | Trust region Length Max $d_{\max}$               | 30                                             |
|                                                       | Batch size                                       | 1                                              |
|                                                       | Nb. of initial points                            | 20                                             |
|                                                       | GP-parameters slice sampling steps               | 100 (init) / 10 (refine)                       |
|                                                       | Acquisition function                             | Expected Improvement                           |
| HEBO                                                  | Nb. of random samples for BFLS                   | 20,000                                         |
|                                                       | Nb. of initial points for BFLS                   | 20                                             |
|                                                       | Batch size                                       | 1                                              |
|                                                       | Surrogate Model                                  | Gaussian Process                               |
|                                                       | Acquisition Class                                | Evolution Optimiser                            |
|                                                       | Acquisition Optimiser                            | MACE                                           |
| TURBO                                                 | Population Size                                  | 100                                            |
|                                                       | Optimiser Nb. of Iterations                      | 100                                            |
|                                                       | Optimiser ES                                     | NSGA-II                                        |
|                                                       | Batch size                                       | 1                                              |
|                                                       | Nb. of trust regions                             | 1                                              |
|                                                       | Trust region Length Min                          | $2^{-7}$                                       |
|                                                       | Trust region Length Max                          | 1.6                                            |
|                                                       | Trust region Length Init                         | 0.8                                            |
|                                                       | $\tau_{\text{succ}}$                             | 3                                              |
|                                                       | $\tau_{\text{fail}}$                             | $d$                                            |
|                                                       | Max Cholesky Size                                | 2000                                           |
|                                                       | GP fit - Optimiser                               | Adam                                           |
| GP fit - Training Steps                               | 50                                               |                                                |
| GP fit - Learning Rate                                | 0.1                                              |                                                |
| Nb. of Thompson Samples                               | $\min(100d, 5000)$                               |                                                |
| GA                                                    | Population size                                  | 40                                             |
|                                                       | Nb. of iterations                                | 5                                              |
|                                                       | Nb. of parents                                   | 16                                             |
|                                                       | Nb. of elite                                     | 6                                              |
|                                                       | Crossover type                                   | uniform                                        |
|                                                       | Crossover probability                            | 1.                                             |
|                                                       | Elite ratio                                      | 0.15                                           |
|                                                       | Mutation probability                             | $1/d$                                          |
| RS                                                    | Nb. of iterations                                | 200                                            |
|                                                       | Sampling type                                    | uniform                                        |
| LamBO                                                 | Query batch size ( $b$ )                         | 1                                              |
|                                                       | Batch set size ( $ \mathcal{X}_{\text{base}} $ ) | 16                                             |
|                                                       | Nb. of initial points ( $ \mathcal{D}_0 $ )      | 200                                            |
|                                                       | Surrogate model                                  | Exact GP ( <code>single_task_exact_gp</code> ) |
|                                                       | Acquisition function)                            | Expected Improvement                           |
| Encoder                                               | <code>mlm_cnn</code>                             |                                                |

Table 1: Hyperparameter Configuration of different optimisation methods explained in the Method Section 11.8 of a manuscript.

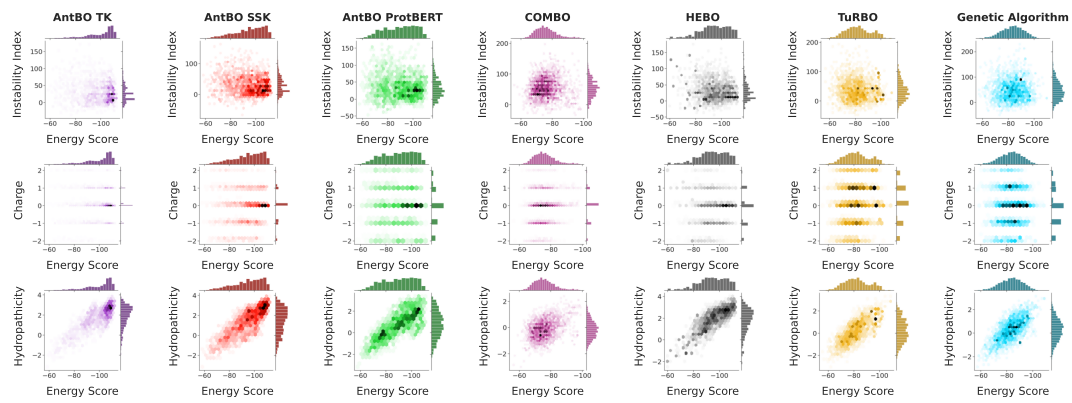

(a) 1ADQ (A)

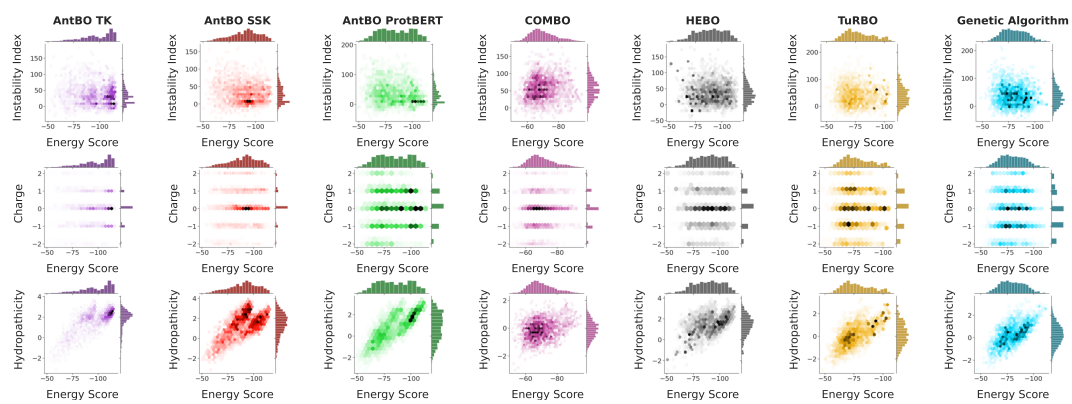

(b) 1FBI (X)

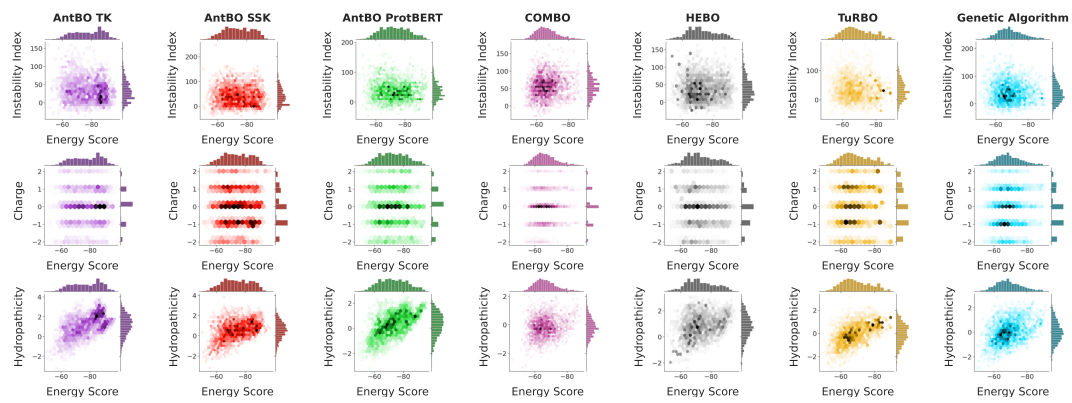

(c) 1H0D (C)

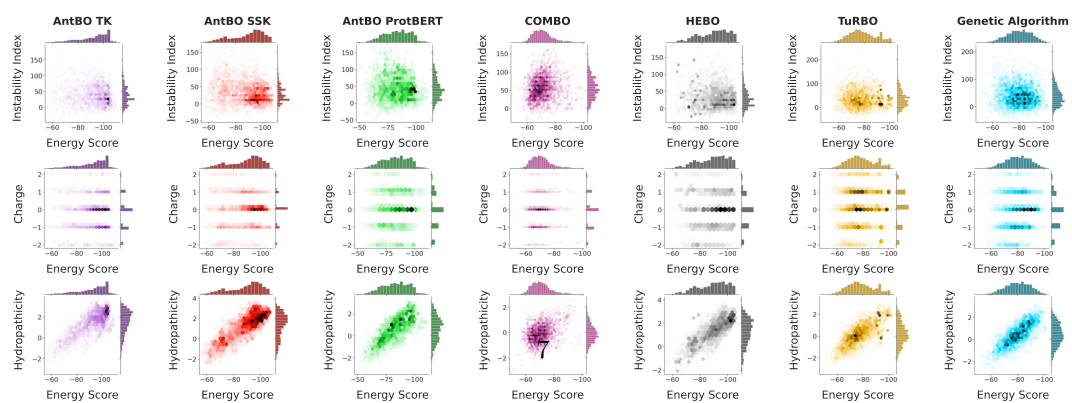

(d) 1NSN (S)

Figure S 6: We analyse the developability scores of 200 proteins designed by each method averaged across all 10 random seeds. Related to Figure 4 of the manuscript.



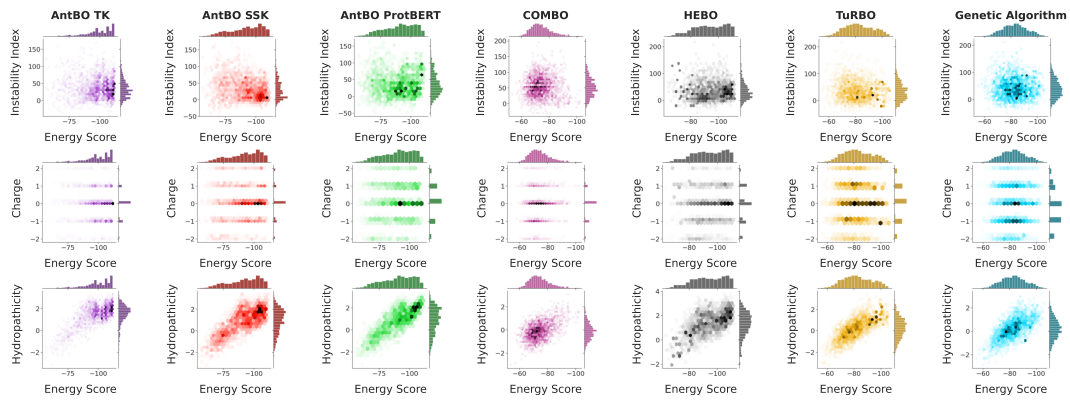

(a) IOB1 (C)

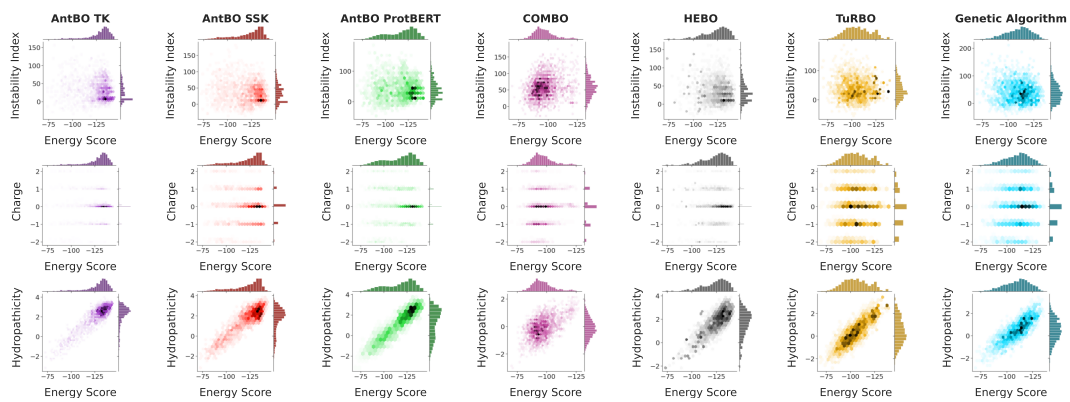

(b) 1S78 (B)

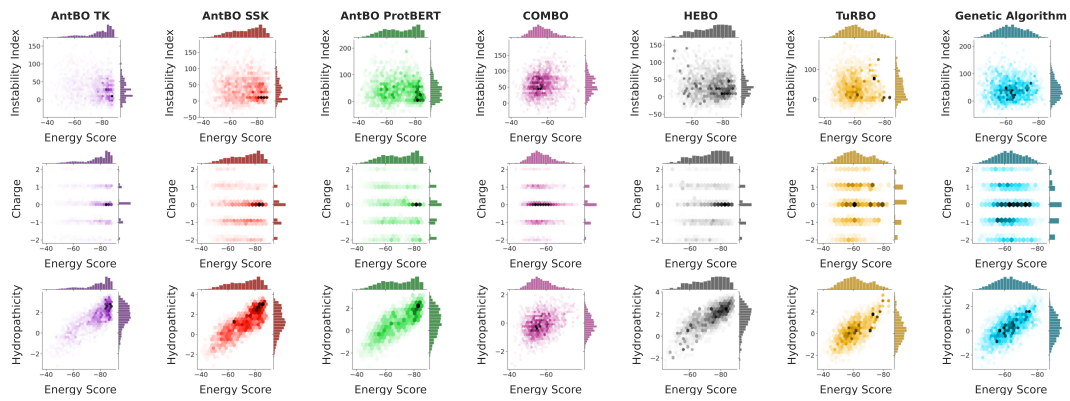

(c) 1WEJ (F)

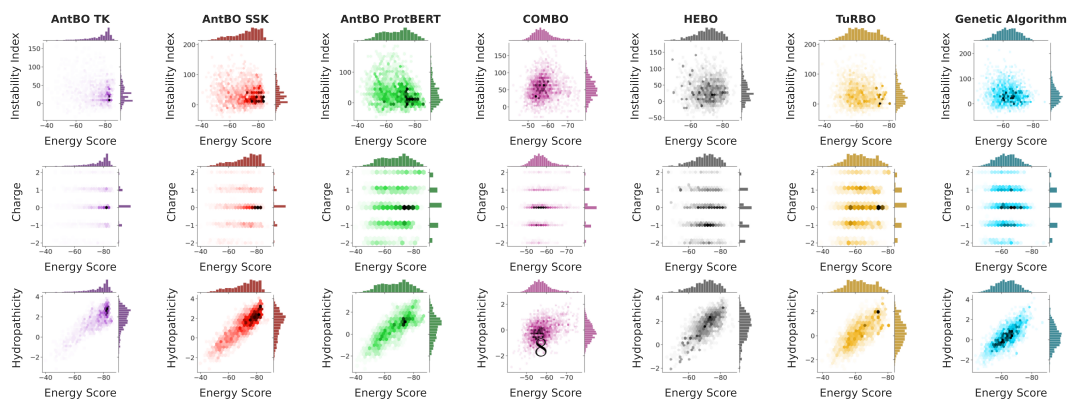

(d) 2JEL (P)

Figure S 7: We analyse the developability scores of 200 proteins designed by each method averaged across all 10 random seeds. Related to Figure 4 of the manuscript.

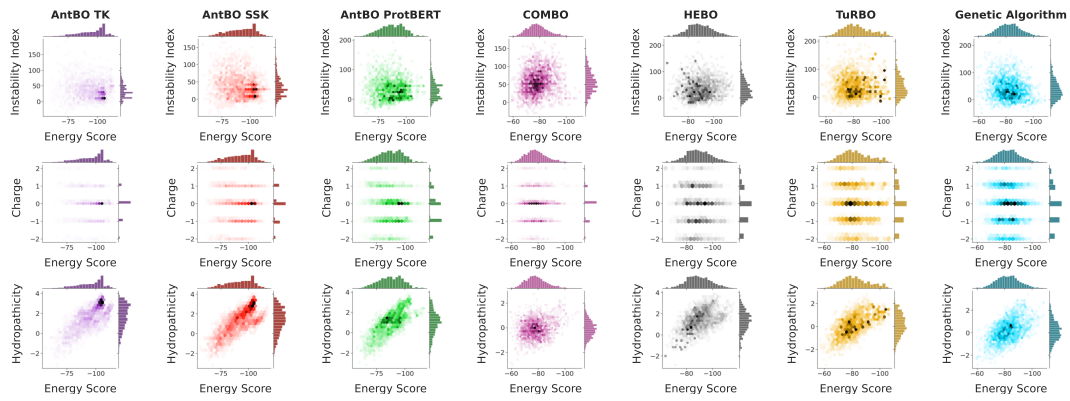

(a) 2YPV (A)

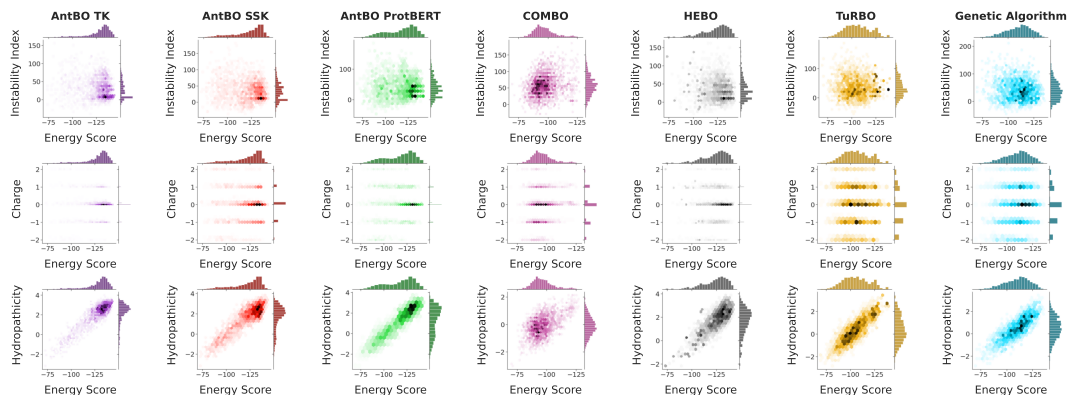

(b) 3RAJ (A)

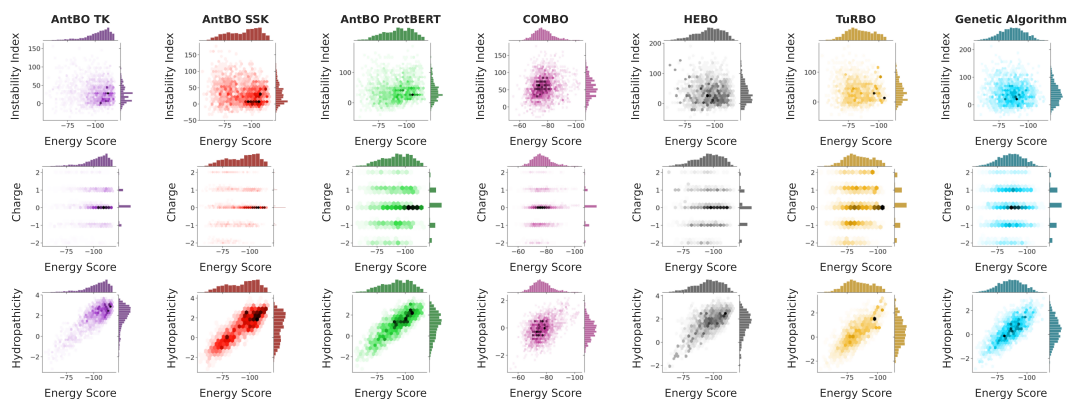

(c) 3VRL (C)

Figure S 8: We analyse the developability scores of 200 proteins designed by each method averaged across all 10 random seeds. Related to Figure 4 of the manuscript.
